# Supplementary material
Source: PubMed Central journal article supplement (PMC4071105)
Supplement: supp_mcu087_mcu087supp4.pdf [file supp_mcu087_mcu087supp4.pdf]

SUPPLEMENTARY DATA 4

Table S4.1: Coefficients of negative-binomial generalized linear model estimating effects of fertilizer treatment (low, high), pollination treatment (unpollinated, full pollination), and their interaction on flowers per plant for 70 glasshouse-grown *Brassica rapa* plants.

|                                      | Estimate | Std. Error | z value | P      |
|--------------------------------------|----------|------------|---------|--------|
| Intercept                            | 4.16     | 0.12       | 35.26   | < 0.01 |
| Fertilizer (high)                    | 0.90     | 0.17       | 5.35    | < 0.01 |
| Pollination (full)                   | -0.42    | 0.16       | -2.60   | <0.01  |
| Fertilizer (high)*Pollination (full) | -0.13    | 0.23       | -0.587  | 0.56   |

Mean (mean+SD, mean-SD) flower production per plant by treatment. Because the distribution of flowers produced was highly skewed, we log-transformed prior to calculating means. Values presented here are back-transformed.

Low fertilizer, no pollination: 57.6 (35.3, 94.1),  $N = 16$  plants

Low fertilizer, full pollination: 40.7 (30.3, 54.5),  $N = 19$  plants

High fertilizer, no pollination: 139.5 (82.6, 235.6),  $N = 15$  plants

High fertilizer, full pollination: 76.6 (42.5, 144.9),  $N = 20$  plants
