# Supplementary material
Source: PubMed Central journal article supplement (PMC4071105)
Supplement: supp_mcu087_mcu087supp5.pdf [file supp_mcu087_mcu087supp5.pdf]

SUPPLEMENTARY DATA 5

Table S5.1: Results of ACNOVA model examining effects of fertilizer treatment (low, high), pollination treatment (unpollinated, full pollination), and log-transformed flowers per plant (covariate) on flowering duration for 70 glasshouse-grown *Brassica rapa* plants. Terms in bold are statistically significant at alpha = 0.05.

|                                           | <i>F</i>     | <i>df</i>    | <i>p</i>        |
|-------------------------------------------|--------------|--------------|-----------------|
| <b>Fertilizer</b>                         | <b>5.78</b>  | <b>1, 62</b> | <b>0.02</b>     |
| <b>Pollination</b>                        | <b>30.40</b> | <b>1, 62</b> | <b>&lt;0.01</b> |
| <b>log(total flowers)</b>                 | <b>6.61</b>  | <b>1, 62</b> | <b>0.01</b>     |
| Fertilizer*Pollination                    | 0.07         | 1, 62        | 0.79            |
| <b>Fertilizer*log(total flowers)</b>      | <b>5.83</b>  | <b>1, 62</b> | <b>0.02</b>     |
| Pollination*log(total flowers)            | 1.41         | 1, 62        | 0.24            |
| Fertilizer*Pollination*log(total flowers) | 0.28         | 1, 62        | 0.60            |
