# Supplementary material
Source: PubMed Central journal article supplement (PMC4071105)

## SUPPLEMENTARY DATA 6

Fig. S6.1. Plant size, estimated by the log-transformed dry mass of the taproot, increased with the addition of fertilizer (closed circles: high fertilizer treatment,  $n = 35$ ; open circles: low fertilizer treatment,  $n = 35$ ;  $F_{1,67} = 131.26$ ,  $P < 0.01$ ) and with day of bolting ( $F_{1,67} = 74.28$ ,  $P < 0.01$ ). The equation reports the calculated linear trend in plant size as a function of bolting day, pooling observations from the high and low fertilizer treatments.

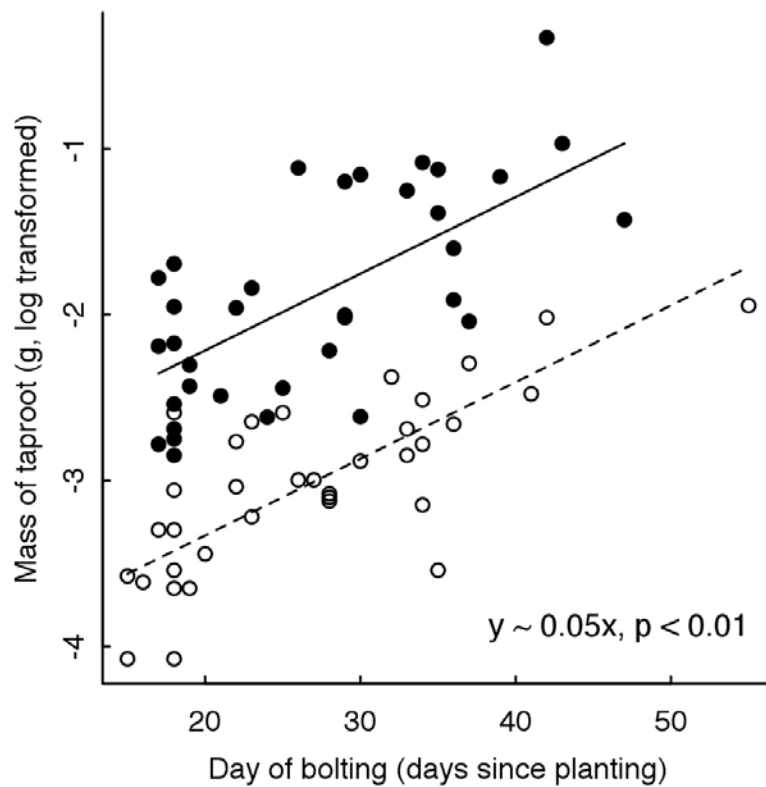

Supplement: supp_mcu087_mcu087supp6.pdf [file supp_mcu087_mcu087supp6.pdf]
